# Supplementary material for: Postpartum Weight Retention and Its Determinants in Lebanon and Qatar: Results of the Mother and Infant Nutrition Assessment (MINA) Cohort
Source: PubMed Central journal article supplement (PMC7672614; doi:10.3390/ijerph17217851), 2020-10-27
Supplement: ijerph-17-07851-s001.pdf [file ijerph-17-07851-s001.pdf]

**Table 1.** Sociodemographic and lifestyle characteristics of study participants stratified by Country.

|                                                | <b>Total</b><br><b>(n = 183)</b> | <b>Lebanon</b><br><b>(n = 93)</b> | <b>Qatar</b><br><b>(n = 90)</b> | <b>p-value</b>   |
|------------------------------------------------|----------------------------------|-----------------------------------|---------------------------------|------------------|
| <b>PWR<sub>6</sub> (Kg)</b>                    | 2.69 ± 0.35                      | 2.12 ± 0.46                       | 3.27 ± 0.53                     | 0.100            |
|                                                |                                  |                                   |                                 | <b>0.015</b>     |
| below median                                   | 92 (50.3)                        | 55 (59.1)                         | 37 (41.1)                       |                  |
| above median                                   | 91 (49.7)                        | 38 (40.9)                         | 53 (58.9)                       |                  |
| <b>Maternal age (years)</b>                    | 28.04 ± 0.37                     | 28.09 ± 0.49                      | 28 ± 0.55                       | 0.906            |
| 18-24.9                                        | 46 (25.7)                        | 22 (23.9)                         | 24 (27.6)                       | 0.534            |
| 25-29.9                                        | 65 (36.3)                        | 37 (40.2)                         | 28 (32.2)                       |                  |
| ≥ 30                                           | 68 (38)                          | 33 (35.9)                         | 35 (40.2)                       |                  |
| <b>Employment status</b>                       |                                  |                                   |                                 |                  |
| Housewife                                      | 94 (53.1)                        | 32 (35.6)                         | 62 (71.3)                       | <b>&lt;0.001</b> |
| Employee                                       | 83 (46.9)                        | 58 (64.4)                         | 25 (28.7)                       |                  |
| <b>Education</b>                               |                                  |                                   |                                 |                  |
| Up to high school                              | 26 (15)                          | 13 (14.3)                         | 13 (15.9)                       | 0.773            |
| University or higher*                          | 147 (85)                         | 78 (85.7)                         | 69 (84.1)                       |                  |
| <b>Income</b>                                  |                                  |                                   |                                 |                  |
| Low, <1000\$                                   | 8 (12.5)                         | 3 (8.11)                          | 11 (10.89)                      | 0.689            |
| Medium, 1000\$-2000\$                          | 16 (25)                          | 8 (21.62)                         | 24 (23.76)                      |                  |
| High, >2000\$                                  | 40 (62.5)                        | 26 (70.27)                        | 66 (65.35)                      |                  |
| <b>Number of children</b>                      |                                  |                                   |                                 |                  |
| 0                                              | 51 (30.4)                        | 30 (37)                           | 21 (24.1)                       | 0.069            |
| 1 or more                                      | 117 (69.6)                       | 51 (63)                           | 66 (75.9)                       |                  |
| <b>Pre-pregnancy BMI †</b>                     |                                  |                                   |                                 |                  |
| Underweight and normal (<25kg/m <sup>2</sup> ) | 98 (55.7)                        | 62 (68.1)                         | 36 (42.4)                       | <b>0.001</b>     |
| Overweight and obese (≥25kg/m <sup>2</sup> )   | 78 (44.3)                        | 29 (31.9)                         | 49 (57.6)                       |                  |
| <b>First trimester BMI †</b>                   |                                  |                                   |                                 |                  |
| Underweight and normal (<25kg/m <sup>2</sup> ) | 94 (52.5)                        | 61 (67)                           | 33 (37.5)                       | <b>&lt;0.001</b> |
| Overweight and obese (≥25kg/m <sup>2</sup> )   | 85 (47.5)                        | 30 (33)                           | 55 (62.5)                       |                  |
| <b>GWG (Kg)</b>                                |                                  |                                   |                                 |                  |
| Insufficient                                   | 64 (36.6)                        | 26 (29.2)                         | 38 (44.2)                       | 0.120            |
| Adequate                                       | 56 (32)                          | 32 (36)                           | 24 (27.9)                       |                  |
| Excessive                                      | 55 (31.4)                        | 31 (34.8)                         | 24 (27.9)                       |                  |
| <b>Type of delivery</b>                        |                                  |                                   |                                 |                  |
| Caesarean                                      | 96 (30.1)                        | 61 (42.7)                         | 35 (19.9)                       | <b>&lt;0.001</b> |
| Normal/vaginal                                 | 223 (69.9)                       | 82 (57.3)                         | 141 (80.1)                      |                  |
| <b>Occurrence of delivery complication</b>     |                                  |                                   |                                 |                  |
| No                                             | 153 (56.5)                       | 88 (61.1)                         | 65 (51.2)                       | 0.100            |
| Yes                                            | 118 (43.5)                       | 56 (38.9)                         | 62 (48.8)                       |                  |
| <b>Preterm / full term delivery</b>            |                                  |                                   |                                 |                  |
| Full term (≥37 weeks)                          | 301 (93.2)                       | 131 (92.9)                        | 170 (93.4)                      | 0.860            |
| Preterm (<37 weeks)                            | 22 (6.8)                         | 10 (7.1)                          | 12 (6.6)                        |                  |
| <b>Exclusive Breastfeeding for 6 months</b>    |                                  |                                   |                                 |                  |
| No                                             | 115(79.3)                        | 62(83.8)                          | 53(74.6)                        | 0.175            |
| Yes                                            | 30(20.7)                         | 12(16.2)                          | 18(25.4)                        |                  |
| <b>Pre-pregnancy smoking status</b>            |                                  |                                   |                                 |                  |
| Non-smoker                                     | 144 (78.7)                       | 56 (60.2)                         | 88 (97.8)                       | <b>&lt;0.001</b> |
| Smoker                                         | 39 (21.3)                        | 37 (39.8)                         | 2 (2.2)                         |                  |
| <b>Pre-pregnancy breakfast consumption</b>     |                                  |                                   |                                 |                  |
| Regular**                                      | 138 (77.1)                       | 72 (78.3)                         | 66 (75.9)                       | 0.703            |
| Not regular                                    | 41 (22.9)                        | 20 (21.7)                         | 21 (24.1)                       |                  |
| <b>Physical activity</b>                       |                                  |                                   |                                 |                  |
| Low                                            | 42 (33.1)                        | 17 (30.4)                         | 25 (35.2)                       | 0.517            |
| Moderate                                       | 43 (33.9)                        | 22 (39.3)                         | 21 (29.6)                       |                  |

High

42 (33.1)

17 (30.4)

25 (35.2)

Data are expressed as mean  $\pm$  SE for PWR<sub>6</sub> and maternal age while the rest of the variable were presented as absolute numbers and percentages. Numbers in bold are statistically significant ( $p$ -value  $\leq$  0.05). \* Including technical diploma. \*\*Three or more times per week. <sup>†</sup>BMI was stratified according to the WHO criteria [42]. Abbreviations: PWR<sub>6</sub>: postpartum weight retention at 6 months; BMI: body mass index; GWG: gestational weight gain.

**Table 2.** Absolute macro and micronutrients intakes of study participants stratified by PWR<sub>6</sub> (below and above median values).

|                         | Total                | PWR <sub>6</sub> $\leq$ 2.4<br>(below median) | PWR <sub>6</sub> $>$ 2.4<br>(above median) | $p$ -value   |
|-------------------------|----------------------|-----------------------------------------------|--------------------------------------------|--------------|
|                         | Mean $\pm$ SE        | Mean $\pm$ SE                                 | Mean $\pm$ SE                              |              |
| Energy (Kcal)           | 2853.35 $\pm$ 166.99 | 2530.86 $\pm$ 147.23                          | 3172.29 $\pm$ 295.74                       | 0.054        |
| Protein (g)             | 111.54 $\pm$ 7.22    | <b>92.47 <math>\pm</math> 4.15</b>            | <b>130.4 <math>\pm</math> 13.51</b>        | <b>0.008</b> |
| Carbohydrate (g)        | 311.1 $\pm$ 17.09    | <b>272 <math>\pm</math> 10.88</b>             | <b>349.77 <math>\pm</math> 31.83</b>       | <b>0.023</b> |
| Fat (g)                 | 128.88 $\pm$ 9.56    | 119.89 $\pm$ 13.16                            | 137.78 $\pm$ 13.87                         | 0.351        |
| Saturated fat (g)       | 38.01 $\pm$ 2.88     | 34.08 $\pm$ 3.58                              | 41.9 $\pm$ 4.48                            | 0.175        |
| Monounsaturated fat (g) | 44.67 $\pm$ 3.26     | 41.3 $\pm$ 4.11                               | 48.01 $\pm$ 5.06                           | 0.305        |
| Polyunsaturated fat (g) | 34.85 $\pm$ 3.05     | 34.14 $\pm$ 5.1                               | 35.55 $\pm$ 3.4                            | 0.817        |
| Trans fatty acid (g)    | 0.81 $\pm$ 0.08      | 0.67 $\pm$ 0.11                               | 0.95 $\pm$ 0.1                             | 0.071        |
| Sugar (g)               | 102.3 $\pm$ 4.98     | <b>90.45 <math>\pm</math> 4.46</b>            | <b>114.02 <math>\pm</math> 8.74</b>        | <b>0.018</b> |
| Cholesterol (mg)        | 369.9 $\pm$ 23.94    | <b>317.01 <math>\pm</math> 21.33</b>          | <b>422.23 <math>\pm</math> 42.12</b>       | <b>0.027</b> |
| Sodium (mg)             | 2844.74 $\pm$ 174.89 | <b>2459.93 <math>\pm</math> 132.34</b>        | <b>3225.36 <math>\pm</math> 318.36</b>     | <b>0.028</b> |
| Calcium (mg)            | 1110.9 $\pm$ 55.11   | <b>985.29 <math>\pm</math> 58.59</b>          | <b>1235.14 <math>\pm</math> 91.55</b>      | <b>0.023</b> |
| Iron (mg)               | 15.03 $\pm$ 0.87     | 13.33 $\pm$ 0.64                              | 16.7 $\pm$ 1.59                            | 0.051        |
| Dietary fiber (g)       | 23.31 $\pm$ 1.28     | 21.31 $\pm$ 0.97                              | 25.29 $\pm$ 2.35                           | 0.12         |

Abbreviations: PWR<sub>6</sub>: gestational weight gain retention at 6 months postpartum; Kcal: calories; mg: milligram; g: gram. Data are expressed as mean  $\pm$  SE. Differences among group means were tested using independent sample t-test. Numbers in **bold** are statistically significant ( $p$ -value  $\leq$  0.05).
